# Supplementary material for: The Prognostic Value of Blood-Based Biomarkers in Patients With Testicular Diffuse Large B-Cell Lymphoma
Source: PubMed Central journal article supplement (PMC6914857; doi:10.3389/fonc.2019.01392), 2019-12-10
Supplement: Image_1.pdf [file Image_1.pdf]

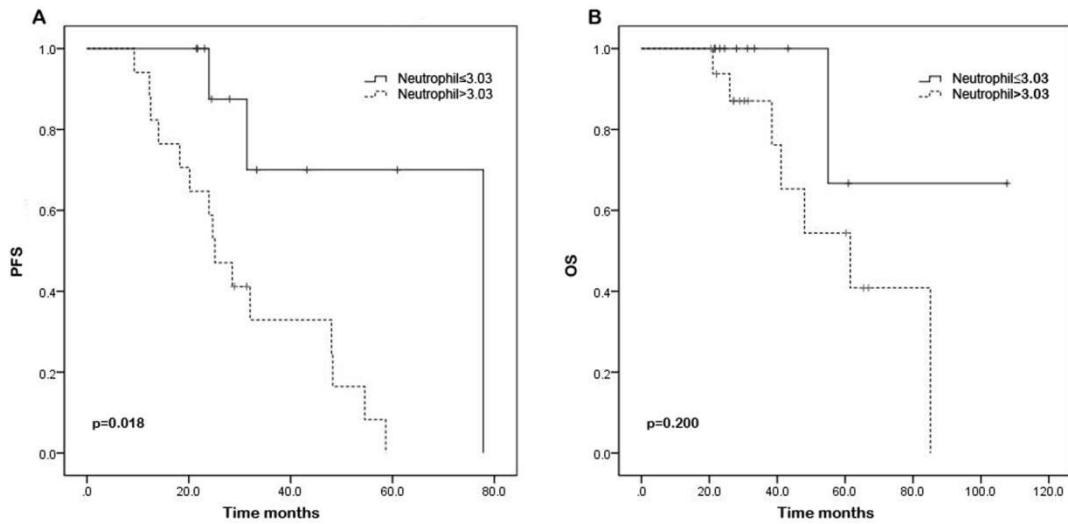

Supporting Figure 1: Kaplan–Meier curves of progression-free survival (PFS) and overall survival (OS) in testicular diffuse large B-cell lymphoma patients with high and low absolute neutrophil counts ( $p=0.018$ ,  $p=0.200$ , respectively).

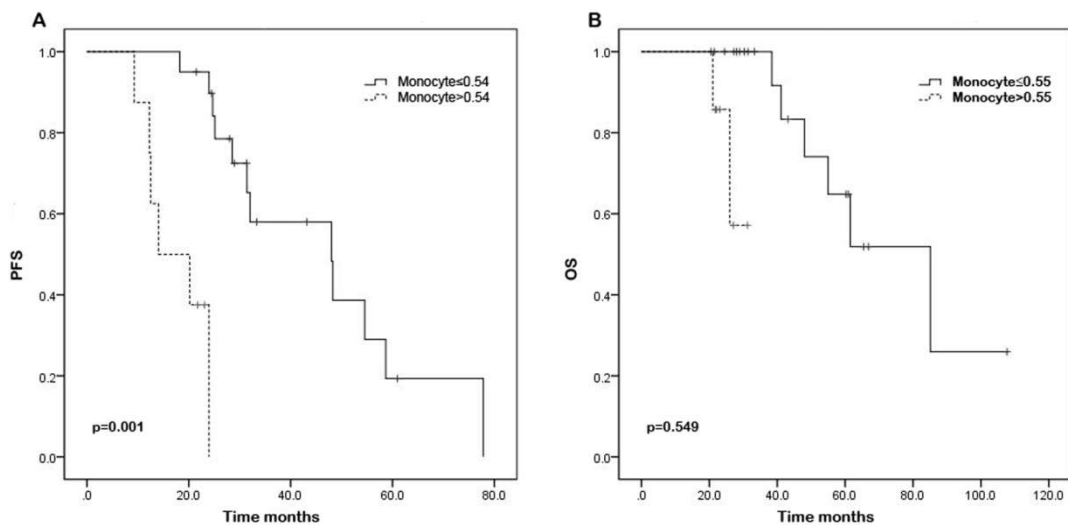

Supporting Figure 2: Kaplan–Meier curves of progression-free survival (PFS) and overall survival (OS) in testicular diffuse large B-cell lymphoma patients with high and low absolute monocyte counts ( $p=0.001$ ,  $p=0.549$ , respectively).

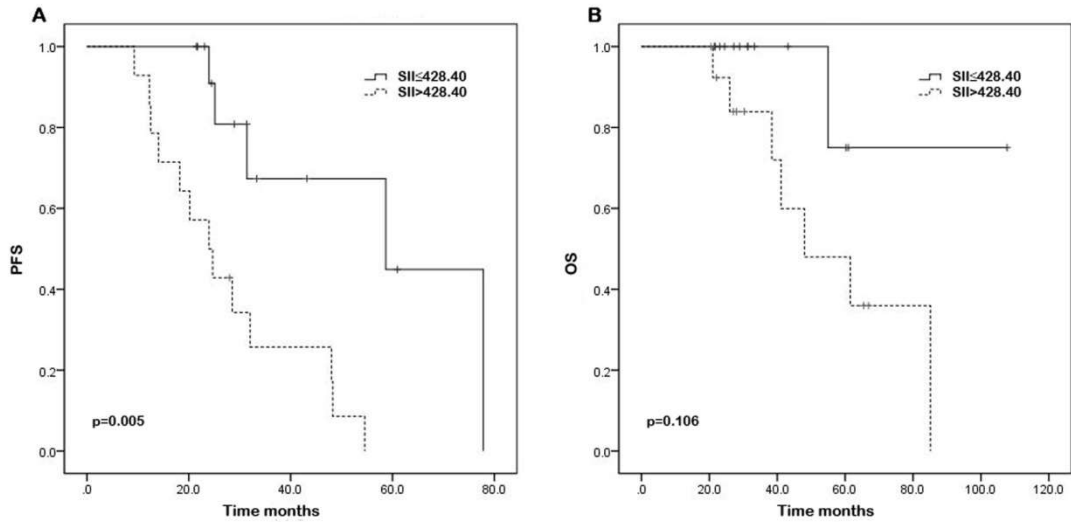

Supporting Figure 3: Kaplan–Meier curves of progression-free survival (PFS) and overall survival (OS) in testicular diffuse large B-cell lymphoma patients with high and low systemic immune-inflammation index (SII) ( $p=0.005$ ,  $p=0.106$ , respectively).

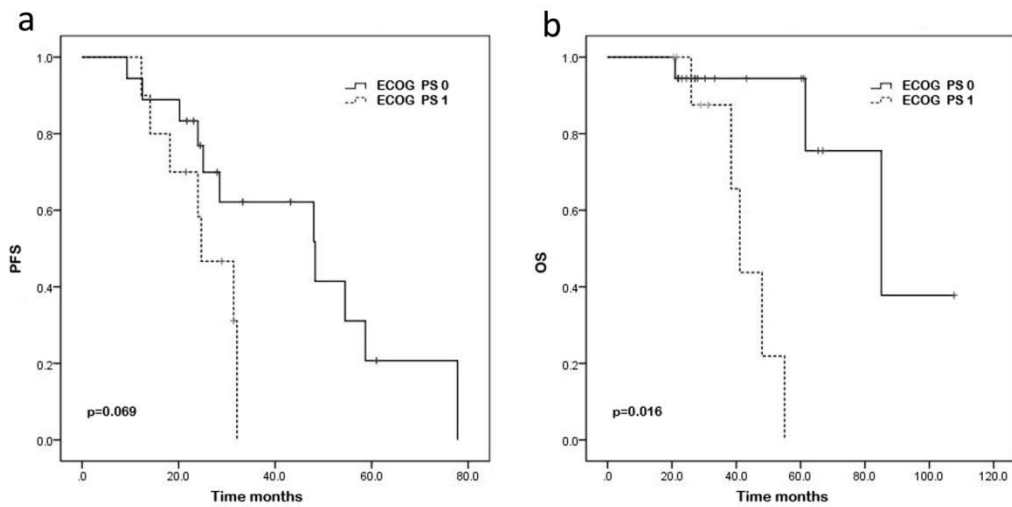

Supporting Figure 4: Kaplan–Meier curves of progression-free survival (PFS) and overall survival (OS) in testicular diffuse large B-cell lymphoma patients with Eastern Cooperative Oncology Group (ECOG) performance status (PS) of 0 or 1 ( $p=0.069$ ,  $p=0.016$ , respectively).

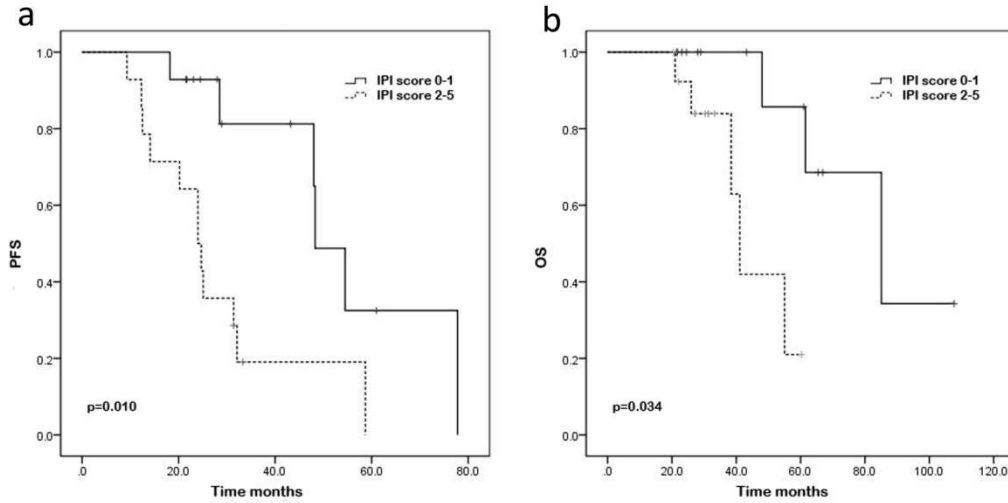

Supporting Figure 5: Kaplan–Meier curves of progression-free survival (PFS) and overall survival (OS) in testicular diffuse large B-cell lymphoma patients with International Prognostic Index (IPI) score 0-1 or 2-5 ( $p=0.010$ ,  $p=0.034$ , respectively).

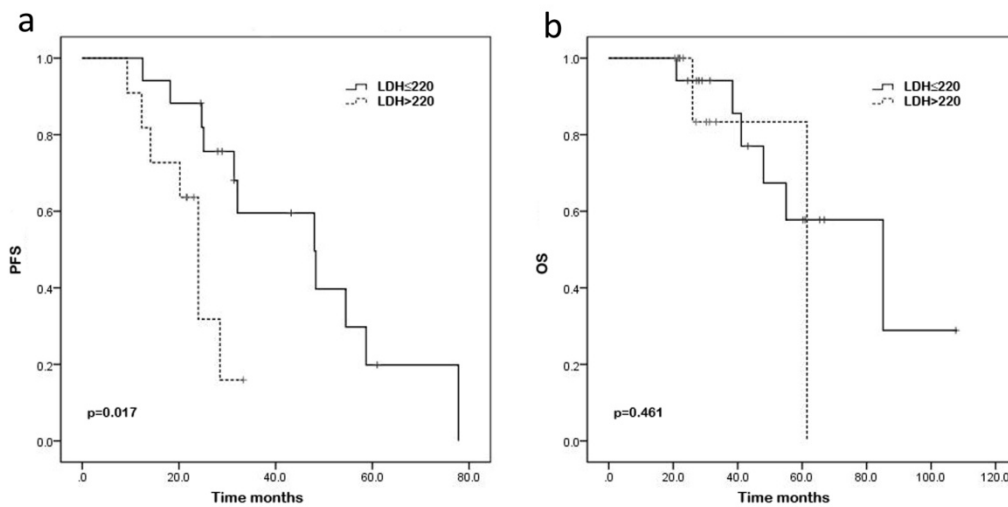

Supporting Figure 6: Kaplan–Meier curves of progression-free survival (PFS) and overall survival (OS) in testicular diffuse large B-cell lymphoma patients with high and low lactate dehydrogenase (LDH) ( $p=0.017$ ,  $p=0.461$ , respectively).
